# Supplementary material for: A Neural Population Model Incorporating Dopaminergic Neurotransmission during Complex Voluntary Behaviors
Source: PubMed Central journal article supplement (PMC4230744; doi:10.1371/journal.pcbi.1003924), 2014-11-13
Supplement: pcbi.1003924.s001.pdf [file pcbi.1003924.s001.pdf]

## 1 Supporting Information

2

### 3 Hemodynamic Response Model

4

5 To reduce computational load, the raw regional neural voltages with a temporal resolution of 0.1ms  
 6 generated by the model were down-sampled to 100Hz. We also observed that higher temporal resolutions  
 7 did not alter the dynamics of the simulated BOLD time-series. In order to be able to meaningfully  
 8 compare the simulated signals to the considered fMRI data, the model was run for the same period  
 9 of time the data was recorded in. For instance, the resting state data was acquired over a period of  
 10 five minutes. Thus, 3 000 000 ms were simulated to obtain a comparable signal. Following [1] a linear  
 11 hemodynamic response function was employed:

$$12 \quad (1) \quad \psi(t) = \Psi_1 e^{-t/\vartheta_1} t^{\alpha_1-1} - \Psi_2 e^{-t/\vartheta_2} t^{\alpha_2-1},$$

13 where we used  $\Psi_1 = 0.02$ ,  $\Psi_2 = 2.34e - 8$  as amplitudes of the filter,  $\vartheta_{1,2} = 0.9$  as temporal delays, and  
 14 the scaling factors  $\alpha_1 = 7.98$ ,  $\alpha_2 = 13.97$ . Regional neural voltages  $V_t^i$  were thus transformed to BOLD  
 15 signals using the convolution  $\psi * V^i$ . Note that the amplitudes  $\Psi_i$  of the BOLD filter  $\psi$  were not fit to the  
 16 data to avoid any undue influence on the auto-correlative structure of the model. However, if the scope of  
 17 a study were to accurately reproduce a given BOLD signal, such a fitting procedure should be employed  
 18 to maximize alignment between model and data. Finally, the convoluted signal was sub-sampled to match  
 19 recording parameters of the data.

20

### 21 Null-Model Random Network Construction

22 The values of most network measures strongly depend on a graph's size (i.e., the number of nodes), its  
 23 density and its degree distribution [2, Chap. 2]. Therefore, the significance of differences in metrics is  
 24 usually assessed by comparing values to ones calculated for null-hypothesis networks, which are based on  
 25 the original graphs but constructed to exhibit random topologies [3]. In this work, the random graphs  
 26 were based on the NMI matrices shown in Fig. 2 and constructed to preserve the degree-, weight- and  
 27 strength- distributions of the original networks.

## 28 Graph Metrics

29 In the following, we give a brief description of the network metrics used in this paper. A comprehensive  
 30 review of graph measures and their applications for the understanding of normal and diseased brain states  
 31 is given in [2, 3].

32 Every graph  $G$  consists of a set of nodes (vertices) and edges (links), formally written as  $G = \langle V, E \rangle$ .  
 33 In case of the functional brain networks discussed here, the nodes are brain areas, i.e., points in three-  
 34 dimensional space. Thus, we introduce the set of nodes  $\mathbf{V} = \{\mathbf{v}_i \in \mathbb{R}^3 \mid i = 1, \dots, N\}$ , where  $N$  denotes  
 35 the number of considered regions. Because functional connectivity networks are undirected, we only  
 36 consider edges without orientation, i.e., the edge connecting nodes  $\mathbf{v}_i$  and  $\mathbf{v}_j$  is the same as the link from  
 37  $\mathbf{v}_i$  to  $\mathbf{v}_j$  (incoming and outgoing connections are identical). Hence, we write the edge connecting  $\mathbf{v}_i$  and  
 38  $\mathbf{v}_j$  as unordered pair  $\{\mathbf{v}_i, \mathbf{v}_j\}$  or  $\mathbf{v}_i \leftrightarrow \mathbf{v}_j$  and thus we define the set of all edges in the undirected graph  
 39 as  $\mathbf{E} = \{\mathbf{v}_i \leftrightarrow \mathbf{v}_j \mid 1 \leq i, j \leq N\}$ . Hence, we consider the graph  $\mathbf{G} = \langle \mathbf{V}, \mathbf{E} \rangle$ . Let further  $\{a_{ij}\}_{i,j=1}^N =:$   
 40  $\mathbf{A} \in \mathbb{R}^{N \times N}$  denote the graph's adjacency matrix such that

$$41 \quad (2) \quad a_{ij} = \begin{cases} 1, & \text{if } \mathbf{v}_i \leftrightarrow \mathbf{v}_j \in \mathbf{E}, \\ 0, & \text{otherwise.} \end{cases}$$

42 The considered networks are weighted undirected networks, thus each edge  $\mathbf{v}_i \leftrightarrow \mathbf{v}_j$  is associated with a  
 43 weight  $w_{ij} = w_{ji}$ . Hence we introduce a mapping  $W : \mathbf{E} \rightarrow \mathbb{R}$  given by

$$44 \quad (3) \quad W(\mathbf{v}_i \leftrightarrow \mathbf{v}_j) = w_{i,j}, \quad 1 \leq i, j \leq N,$$

45 and collect all edge weights in a (real symmetric)  $N \times N$  matrix  $\mathbf{W} = \{w_{ij}\}_{i,j=1}^N$  (where we set  $w_{k\ell} = 0$   
 46 if there exists no edge between  $\mathbf{v}_k$  and  $\mathbf{v}_\ell$ ). Based on these quantities a number of network metrics can  
 47 be computed.

48 **Nodal Influence** Metrics estimating nodal influence try to quantify a single node's importance in the  
 49 network. One of the simplest influence measures is the *degree* of the node  $\mathbf{v}_i$  given by (compare, e.g., [2,  
 50 Chap. 2])

$$51 \quad k_i = \sum_{j=1}^N a_{ij}, \quad i = 1, \dots, N,$$

52 where  $a_{ij}$  denote the entries of the adjacency matrix  $\mathbf{A}$  defined in (2). The weighted version of the degree  
 53 is the nodal *strength* [3]

$$54 \quad s_i = \sum_{j=1}^N w_{ij}, \quad i = 1, \dots, N,$$

55 with  $w_{ij}$  denoting edge weights.

56 **Network Integration** Integration measures are designed to estimate a network's predilection for  
 57 system-wide interaction. Most of these metrics are based on the concept of paths. A path  $\mathbf{p}_{i \leftrightarrow j}$  from  
 58 node  $\mathbf{v}_i$  to  $\mathbf{v}_j$  in the graph  $\mathbf{G}$  is a sequence of nodes  $\mathbf{p}_{i \leftrightarrow j} = \{\mathbf{v}_i = \mathbf{v}_{i_1}, \mathbf{v}_{i_2}, \dots, \mathbf{v}_{i_n} = \mathbf{v}_j\}$  such that  
 59  $\mathbf{v}_{i_k} \leftrightarrow \mathbf{v}_{i_{k+1}} \in \mathbf{E}$  for  $k = 1, \dots, n$ . The shortest (weighted) path  $\bar{\mathbf{p}}_{i \leftrightarrow j}$  between  $\mathbf{v}_i$  and  $\mathbf{v}_j$  is the path with  
 60 minimal total edge weight, also called (weighted) shortest path length

$$61 \quad d_{ij} = \sum_{\{\mathbf{v}_{i_k}, \mathbf{v}_{i_{k+1}}\} \in \bar{\mathbf{p}}_{i \leftrightarrow j}} W(\mathbf{v}_{i_k} \leftrightarrow \mathbf{v}_{i_{k+1}}),$$

62 where we used the mapping  $W$  defined in (3). The *efficiency*  $e_i$  of a node  $\mathbf{v}_i$  estimates the extent of  
 63 possible interaction in a neighborhood around  $\mathbf{v}_i$  in terms of the inverse shortest path length [4]

$$64 \quad e_i = \frac{1}{N-1} \sum_{\substack{j=1 \\ j \neq i}}^N \frac{1}{d_{ij}}, \quad i = 1, \dots, N.$$

65 **Network Segregation** A segregated network is organized into local communities. One of the most  
 66 widely used measures to quantify segregation of a graph is the *clustering coefficient* [5]. The clustering  
 67 coefficient  $c_i$  of a node  $\mathbf{v}_i$  is based on the geometric mean of link weights in triangles around  $\mathbf{v}_i$

$$68 \quad c_i = \frac{2}{k_i(k_i - 1)} \sum_{j,k=1}^N (w_{ij}w_{jk}w_{ki})^{1/3}, \quad i = 1, \dots, N,$$

69 where  $k_i$  denotes the nodal degree.

## 70 References

- 71 1. Glover G (1999) Deconvolution of impulse response in event-related bold fmri. *NeuroImage* 9:  
 72 416–429.

- 73 2. Sporns O (2011) *Networks of the Brain*. MIT Press.
- 74 3. Rubinov M, Sporns O (2010) Complex network measures of brain connectivity: uses and interpre-  
75 tations. *NeuroImage* 52: 1059–1069.
- 76 4. Latora V, Marchiori M (2001) Efficient behavior of small-world networks. *Physical Review Letters*  
77 87.
- 78 5. Onnela JP, Saramäki J, Kertész J, Kaski K (2005) Intensity and coherence of motifs in weighted  
79 complex networks. *Physiscal Review E* 71.
